# Supplementary material
Source: publisher figshare collection journal article supplement (https://gsajournals.figshare.com/ndownloader/files/26175230)
Supplement: Supplementary file 1 [file 26175230]

## Sheet: Table S1
Table S1
Gene	SNP identifier	Chr/position	Branch of alteration	Known disease (GWAS)	Known disease (Knowledge-based)
Atp1a4	UNC2114611	1/167467409	IMMUNE (CMP)	Gout	Non-immune disease only
Cstdc4	UNC26680639	16/39539482	IMMUNE (CMP)		Psoriasis
Six3	JAX00448418	17/83683470	IMMUNE (CMP)	Asthma	Systemic lupus erythematosus
Dkk1	UNC30185638	19/30628628	IMMUNE (CMP)	RA, Asthma	B cell cancer,mature B-cell neoplasia,plasma cell myeloma, plasma cell neoplasm
Tbata	JAX00291263	10/65466845	IMMUNE (CMP)	Infections, acquired immunodeficiency syndrome	Differentiation of T lymphocytes
Uts2	UNC8441287	4/149284510	IMMUNE (CLP)	Asthma, autoimmune disease	Non-immune disease only
Rtp2	JAX00067554	16/25901144	IMMUNE (CLP)		Non-immune disease only
Fbxo47	JAX00319724	11/99279520	IMMUNE (CLP)	Non-immune disease only	Non-immune disease only
Fbxo15	JAX00086124	18/88445881	IMMUNE (CLP)	Pneumonia	Non-immune disease only
Frzb	UNC3419307	2/80862159	IMMUNE (CLP)	RA, leukemia	Plaque psoriasis, rheumatoid arthritis
Avpr1b	UNC1667919	2/80862159	IMMUNE (CLP)	Non-immune disease only	Sepsis, septic shock
Chrdl2	UNC13408268	1/132094879	IMMUNE (CLP)	Non-immune disease only	Colitis
Dlx2	JAX00491869	7/102114223	IMMUNE (CLP)	Lymphoproliperative disorder	Non-immune disease only
Wfdc12	UNC4412615	2/67069119	IMMUNE (CLP)		Plaque psoriasis, psoriasis
Cox7b2	UNC9489781	2/164923857	IMMUNE (CLP)	Non-immune disease only	Non-immune disease only
Klk1b1	JAX00150383	5/76105765	IMMUNE(CLP)		B cell cancer,mature B-cell neoplasia
Snora47	JAX00366845	12/36045238	IMMUNE (CMP)	Lymphatic metastasis
Ccdc148	JAX00490868	7/46918746	NON IMMUNE	Non-immune disease only	Non-immune disease only
Gal3st4	UNC10309430	2/60999760	NON IMMUNE	Non-immune disease only	Non-immune disease only
Gdpd3	JAX00654361	5/141190367	NON IMMUNE	Non-immune disease only	Non-immune disease only
Olfr221	JAX00380497	7/131014214	NON IMMUNE		Small B-cell lymphocytic lymphoma
Stag3	UNC10277368	14/55657865	NON IMMUNE	Non-immune disease only	Systemic autoimmune syndrome
Zfp786	UNC11082579	5/138803993	NON IMMUNE		Non-immune disease only
Rapsn	UNC3494662	6/51979948	NON IMMUNE	Autoimmune disease, asthma	Non-immune disease only
Gm7879	UNC9089767	13/95424169	IMMUNE (CMP)
Olfr877	JAX00689826	5/46061255	IMMUNE (CLP)
Gm5538	UNC5369161	9/34410421	IMMUNE (CMP)
Gm7618	UNC060281055	3/60605794	IMMUNE (CMP)
Gm13710	UNC3419307	6/145714732	IMMUNE (CLP)
E130018O15Rik	JAX00579631	5/39850376	IMMUNE (CLP)
F730016J06Rik	UNC2749662	2/24721433	IMMUNE (CLP)
Gm8482	UNC21725034	12/100170809	IMMUNE (CLP)
Gm20467	UNC30419124	19/48034924	IMMUNE (CLP)
Gm12918	JAX00115784	4/8465623	IMMUNE (CLP)
Gm10647	UNC16518842	2/88623632	NON IMMUNE
Gm6682	UNC20559176	9/64912221	NON IMMUNE
Gm9754	JAX00592664	12/5076380	NON IMMUNE
Olfr157	UNC7129204	5/113377461	NON IMMUNE
Fam196a	UNC070579593	4/43161808	NON IMMUNE
Gm15302	JAX00159409	7/137129494	NON IMMUNE
D630036H23Rik	JAX00330387	8/18816354	NON IMMUNE

## Sheet: Table S2 
Table S2
Gene	SNP identifier	Westra's predicted cell types	Categorization	Known disease (GWAS)	Known disease (Knowledge-based)
Aqp8	UNC13658379	B CELLS	IMMUNE	Colitis, inflammation	Non-immune disease only
Bmp10	UNC11499865	B CELLS	IMMUNE	RA	RA
Atp1a4	UNC2114611	B CELLS	IMMUNE	Colitis, inflammation	Non-immune disease only
Chrna4	UNC4563798	MPS	IMMUNE	colitis, inflammation	Multiple sclerosis, infection
Cwc22	UNC3371968	MPS	IMMUNE	colitis	Non-immune disease only
Gpr83	UNC15893968	T CELLS	IMMUNE	Immune system disease	Non-immune disease only
Pgbd1	UNC22225759	B CELLS;NK	IMMUNE	Lupus, RA	Non-immune disease only
Sptlc3	UNC4035502	NK	IMMUNE	sepsis	Non-immune disease only
St6galnac1	UNC20473322	GNS	IMMUNE	colitis	Latent tuberculosis
Cfc1	UNC436468	B CELLS;GNS;MPS	IMMUNE	Non-immune disease only	Non-immune disease only
Ankrd22	UNC30181134	GNS	IMMUNE	Non-immune disease only	Acute myeloid leukemia
Gcgr	UNC20476679	NK	IMMUNE	Non-immune disease only	Non-immune disease only
Crybb3	JAX00134702	GNS	IMMUNE	Non-immune disease only	Non-immune disease only
Kcnt2	UNC1753695	B CELLS;GNS;MPS	IMMUNE	Non-immune disease only	Non-immune disease only
Hsf5	UNC20040937	B CELLS;GNS;MPS	IMMUNE	Non-immune disease only	Non-immune disease only
Psma8	UNC28747070	NK	IMMUNE	Non-immune disease only	Non-immune disease only
Trpm1	UNC12883542	T CELLS	IMMUNE	Non-immune disease only	Non-immune disease only
Insl6	UNC30153772	T CELLS	IMMUNE	Non-immune disease only	Non-immune disease only
Ddx43	UNC090153823	T CELLS	IMMUNE	Non-immune disease only	Chronic myeloid leukemia
Kcne1	UNC27394688	T CELLS	IMMUNE	Non-immune disease only	sepsis, Ebola hemorrhagic fever, COVID-19
Ccdc148	UNC3197203	T CELLS	IMMUNE	Non-immune disease only	Non-immune disease only
Npffr1	UNC18131977	MPS;NK	IMMUNE	Non-immune disease only	Non-immune disease only
Hsd3b3	JAX00530360	MPS	IMMUNE		psoriasis, autoimmune Addison disease
Gstp2	backupUNC190140806	NK	IMMUNE		Psoriasis
Csl	UNC18500542	NK;T CELLS	IMMUNE		Sjögren syndrome
Chrdl2	UNC13408268	B CELLS;GNS	IMMUNE		Colitis
Wfdc12	UNC4331177	B CELLS;MPS	IMMUNE		Psoriasis
Rp1l1	UNC24104852	B CELLS;GNS;NK	IMMUNE		Non-immune disease only
Cbln3	UNC24047072	MPS	IMMUNE		Non-immune disease only
Tigd3	JAX00086821	NK	IMMUNE		Non-immune disease only
Ifi27l2b	JAX00343087	NK;T CELLS	IMMUNE		Non-immune disease only
Ppef2	JAX00587987	B CELLS	IMMUNE		Non-immune disease only
Wdr27	JAX00431495	BEC;EPITHELIAL;LEC	NON IMMUNE	RA	Non-immune disease only
Lgals7	UNC12515093	EPITHELIAL	NON IMMUNE	Asthma, lymphoma	B cell cancer, lymphomagenesis, B-cell lymphoma
Gypa	JAX00163626	EPITHELIAL;LEC;MATRIXFIB	NON IMMUNE	Autoimmune disease, immunosupression	Acute myeloid leukemia, rheumatoid arthritis
Trim54	UNC050328653	LEC	NON IMMUNE	Gout	Non-immune disease only
Tacr2	JAX00291093	BEC;MATRIXFIB	NON IMMUNE	RA, asthma, colitis	Non-immune disease only
Gabrb1	backupUNC051053262	MATRIXFIB	NON IMMUNE	Non-immune disease only	Tuberculosis, acquired immunodeficiency syndrome, ulcerative colitis
Insl3	JAX00671644	MATRIXFIB	NON IMMUNE	Non-immune disease only	Septic shock, ulcerative colitis, juvenile rheumatoid arthritis, Crohn disease, T-cell large granular lymphocytic leukemia
Kcnd3	UNC5892153	MATRIXFIB	NON IMMUNE	Non-immune disease only	Multiple sclerosis
Ptx4	UNC27681173	EPITHELIAL	NON IMMUNE	Non-immune disease only	Acute myeloid leukemia
Avpr1b	UNC1667919	EPITHELIAL	NON IMMUNE	Non-immune disease only	Sepsis, septic shock
Stag3	UNC10308712	EPITHELIAL	NON IMMUNE	Non-immune disease only	Systemic autoimmune syndrome
Lysmd2	UNC16622501	EPITHELIAL	NON IMMUNE		COVID-19
Pnliprp1	backupJAX00481224	LEC	NON IMMUNE	Non-immune disease only	Autoimmune pancreatitis
Anks4b	UNC13663912	LEC	NON IMMUNE	Non-immune disease only	Non-immune disease only
Slc35f2	JAX00171670	LEC	NON IMMUNE	Non-immune disease only	Non-immune disease only
Klrc3	UNC12031379	LEC	NON IMMUNE	Non-immune disease only	Non-immune disease only
Ugt2b36	UNC9575602	BEC	NON IMMUNE		Non-immune disease only
Rpl7a	JAX00485026	MATRIXFIB	NON IMMUNE	Non-immune disease only	Non-immune disease only
Gal3st4	JAX00598764	MATRIXFIB	NON IMMUNE	Non-immune disease only
Slc38a11	UNC3276311	LEC	NON IMMUNE		Non-immune disease only
Krt24	UNC20182609	MATRIXFIB	NON IMMUNE		Non-immune disease only
Arxes1	UNC31349098	B CELLS	IMMUNE
Gm16006	UNC25660993	B CELLS	IMMUNE
Adam6a	UNC21848529	B CELLS	IMMUNE
Gm12348	JAX00320609	B CELLS;GNS	IMMUNE
Zfp663	UNC4413860	MPS	IMMUNE
Mir1962	JAX00157039	MPS;NK	IMMUNE
Olfr1328	JAX00123711	B CELLS;T CELLS	IMMUNE
Gm12295	JAX00028113	MPS	IMMUNE
Mir686	UNC23998790	MPS	IMMUNE
Gm13680	JAX00096419	NK	IMMUNE
C920008G01Rik	UNC23998790	NK;T CELLS	IMMUNE
Gm11516	UNC110136152	T CELLS	IMMUNE
Gm14504	UNC30626502	T CELLS	IMMUNE
Gm10242	UNC060377743	T CELLS	IMMUNE
E030030I06Rik	UNC17536677	T CELLS	IMMUNE
Hist2h4	UNC5790925	T CELLS	IMMUNE
Gm15860	JAX00134952	B CELLS	IMMUNE
Gm10638	UNC15177911	MPS	IMMUNE
F730016J06Rik	UNC2749662	B CELLS;GNS	IMMUNE
Gm20467	UNC30419124	GNS	IMMUNE
E130018O15Rik	JAX00579631	NK	IMMUNE
Gm7879	UNC9089767	B CELLS;MPS	IMMUNE
Gm5538	UNC5388427	GNS	IMMUNE
Gm14044	UNC3946840	BEC	NON IMMUNE
Snora30	UNC13703032	BEC	NON IMMUNE
Gm6498	UNC23953262	BEC;LEC;MATRIXFIB	NON IMMUNE
C230035I16Rik	UNC22261721	BEC;MATRIXFIB	NON IMMUNE
Gm11679	UNC20473322	LEC	NON IMMUNE
D430018E03Rik	UNC10384598	EPITHELIAL	NON IMMUNE
Gm12452	UNC7151917	EPITHELIAL	NON IMMUNE
Gm16046	UNC27546573	EPITHELIAL	NON IMMUNE
AB041806	UNC8277508	EPITHELIAL	NON IMMUNE
Gm15550	UNC11018236	LEC	NON IMMUNE
Gm11008	JAX00513288	LEC	NON IMMUNE
Gm10131	UNC14378234	LEC	NON IMMUNE
C230062I16Rik	JAX00634115	LEC	NON IMMUNE
EU599041	JAX00150300	MATRIXFIB	NON IMMUNE
Gm17227	JAX00470266	MATRIXFIB	NON IMMUNE
Gm9796	JAX00319745	MATRIXFIB	NON IMMUNE
C130046K22Rik	JAX00319724	MATRIXFIB	NON IMMUNE
Gm10548	UNC29036789	BEC	NON IMMUNE
Gm6541	JAX00379336	LEC;MATRIXFIB	NON IMMUNE
Gm8482	JAX00343741	BEC	NON IMMUNE
Gm5483	UNC26680639	MATRIXFIB	NON IMMUNE
Gm15302	JAX00159409	BEC	NON IMMUNE

## Sheet: Table S3
Table S3
	50 genes, 100 repeats		200 genes, 50 repeats		1000 genes, 10 repeats
	mean per gene (seconds)	std (seconds)	mean per gene (seconds)	std (seconds)	mean per gene (seconds)	std (seconds)
CelGen	0.1172	0.223	0.1095	0.306	0.113	5.32
Westra	0.1554	0.217	0.1295	1	0.13	6.12
Decon-eQTL	0.468	0.912	0.39	1.61	0.402	5.23

## Sheet: Table S4
Table S4
Gene	SNP identifier	Westra's predicted cell types	Number of switches
Arxes1	UNC31349098	B CELLS	1
Aqp8	UNC13658379	B CELLS	1
Bmp10	UNC11499865	B CELLS	1
Gm16006	UNC25660993	B CELLS	1
Adam6a	UNC21848529	B CELLS	1
Ppef2	JAX00587987	B CELLS	1
Gm15860	JAX00134952	B CELLS	1
Atp1a4	UNC2114611	B CELLS	1
Gm10916	UNC23967191	B CELLS;BEC;EPITHELIAL;GNS;LEC;MATRIXFIB;MPS;NK;T CELLS	0
Spg11	JAX00099125	B CELLS;BEC;EPITHELIAL;GNS;LEC;MATRIXFIB;MPS;NK;T CELLS	0
Prss41	UNC27722179	B CELLS;BEC;EPITHELIAL;GNS;LEC;MATRIXFIB;MPS;NK;T CELLS	0
Uts2	UNC8441287	B CELLS;BEC;EPITHELIAL;GNS;LEC;MATRIXFIB;MPS;NK;T CELLS	0
Nipsnap3a	UNC7241516	B CELLS;BEC;EPITHELIAL;GNS;LEC;MATRIXFIB;MPS;NK;T CELLS	0
Tal2	UNC7241516	B CELLS;BEC;EPITHELIAL;GNS;LEC;MATRIXFIB;MPS;NK;T CELLS	0
Hes2	UNC8441287	B CELLS;BEC;EPITHELIAL;GNS;LEC;MATRIXFIB;MPS;NK;T CELLS	0
Ajap1	UNC8441287	B CELLS;BEC;EPITHELIAL;GNS;LEC;MATRIXFIB;MPS;NK;T CELLS	0
Mypn	JAX00290458	B CELLS;BEC;EPITHELIAL;GNS;LEC;MPS;NK;T CELLS	1
Nptx2	UNC10351594	B CELLS;BEC;EPITHELIAL;LEC;MATRIXFIB	2
Mc4r	UNC29448124	B CELLS;BEC;EPITHELIAL;LEC;MATRIXFIB;NK;T CELLS	1
Gm12454	UNC7188934	B CELLS;BEC;GNS;T CELLS	4
Fbxo47	JAX00319724	B CELLS;BEC;LEC;NK;T CELLS	2
Gm12349	JAX00319724	B CELLS;BEC;LEC;NK;T CELLS	2
Olfr56	UNC19599289	B CELLS;EPITHELIAL	2
Gm10647	UNC16504576	B CELLS;EPITHELIAL	2
Olfr883	UNC16163318	B CELLS;EPITHELIAL;GNS;LEC;MPS	4
Vpreb2	JAX00414749	B CELLS;EPITHELIAL;GNS;MATRIXFIB	4
Theg	JAX00020088	B CELLS;EPITHELIAL;GNS;NK	4
Rasgef1c	UNC19546471	B CELLS;EPITHELIAL;GNS;NK;T CELLS	3
Cd209f	JAX00158390	B CELLS;EPITHELIAL;LEC;MATRIXFIB;T CELLS	3
Gm12348	JAX00320609	B CELLS;GNS	2
F730016J06Rik	UNC2749662	B CELLS;GNS	2
Chrdl2	UNC13408268	B CELLS;GNS	2
Snora47	JAX00048112	B CELLS;GNS;LEC;MPS	4
Frzb	UNC3419307	B CELLS;GNS;MATRIXFIB	3
Gm13710	UNC3419307	B CELLS;GNS;MATRIXFIB	3
Cfc1	UNC436468	B CELLS;GNS;MPS	2
Kcnt2	UNC1753695	B CELLS;GNS;MPS	2
Hsf5	UNC20040937	B CELLS;GNS;MPS	2
Rp1l1	UNC24104852	B CELLS;GNS;NK	3
Il1rapl2	UNC31386390	B CELLS;LEC;MATRIXFIB;T CELLS	4
Rhbdl2	UNC8086143	B CELLS;MATRIXFIB	2
Wfdc12	UNC4331177	B CELLS;MPS	2
Gm7879	UNC9089767	B CELLS;MPS	2
Pgbd1	UNC22225759	B CELLS;NK	2
Olfr1328	JAX00123711	B CELLS;T CELLS	2
Gm14044	UNC3946840	BEC	1
Snora30	UNC13703032	BEC	1
Ugt2b36	UNC9575602	BEC	1
Gm10548	UNC29036789	BEC	1
Gm8482	JAX00343741	BEC	1
Gm15302	JAX00159409	BEC	1
Wdr27	JAX00431495	BEC;EPITHELIAL;LEC	2
Snord47	UNC2077695	BEC;EPITHELIAL;LEC;MPS;NK	4
A930038B10Rik	backupUNC140137407	BEC;EPITHELIAL;MPS;NK	4
A230028O05Rik	UNC160157635	BEC;EPITHELIAL;NK;T CELLS	4
Gm15408	UNC10384598	BEC;GNS	2
Klra5	UNC12114108	BEC;LEC	1
Gm6498	UNC23953262	BEC;LEC;MATRIXFIB	2
Srp54c	JAX00333923	BEC;LEC;MATRIXFIB;MPS;NK;T CELLS	3
Gm11981	UNC18992944	BEC;LEC;MATRIXFIB;NK;T CELLS	3
Nudt15	UNC24194081	BEC;LEC;MPS;T CELLS	3
A530016L24Rik	JAX00347797	BEC;LEC;MPS;T CELLS	3
D630036H23Rik	JAX00330387	BEC;LEC;NK	2
C230035I16Rik	UNC22261721	BEC;MATRIXFIB	2
Tacr2	JAX00291093	BEC;MATRIXFIB	2
Olfr877	UNC16163318	BEC;MATRIXFIB;NK	3
Zfp786	UNC11068342	BEC;MPS	2
Gm10080	UNC16311399	BEC;MPS	2
Olfr221	JAX00380497	BEC;MPS;NK	3
Trpm3	UNC30127795	BEC;MPS;T CELLS	3
Rell2	JAX00082377	BEC;NK	2
D430018E03Rik	UNC10384598	EPITHELIAL	1
Lgals7	UNC12515093	EPITHELIAL	1
Gm12452	UNC7151917	EPITHELIAL	1
Gm16046	UNC27546573	EPITHELIAL	1
Lysmd2	UNC16622501	EPITHELIAL	1
AB041806	UNC8277508	EPITHELIAL	1
Ptx4	UNC27681173	EPITHELIAL	1
Avpr1b	UNC1667919	EPITHELIAL	1
Stag3	UNC10308712	EPITHELIAL	1
Gypa	JAX00163626	EPITHELIAL;LEC;MATRIXFIB	2
Fam196a	UNC070579593	EPITHELIAL;LEC;MATRIXFIB;MPS;NK	4
Gm5883	UNC11969658	EPITHELIAL;LEC;T CELLS	3
Kcna5	UNC12003345	EPITHELIAL;LEC;T CELLS	3
Kcnj9	JAX00012269	EPITHELIAL;MATRIXFIB;T CELLS	3
Ankrd22	UNC30181134	GNS	1
St6galnac1	UNC20473322	GNS	1
Crybb3	JAX00134702	GNS	1
Gm20467	UNC30419124	GNS	1
Gm5538	UNC5388427	GNS	1
Rtp2	JAX00067554	GNS;LEC;MATRIXFIB	3
Cyp2d12	UNC25973007	GNS;LEC;T CELLS	3
Baiap2l2	UNC25973007	GNS;LEC;T CELLS	3
Pdxp	UNC25973007	GNS;LEC;T CELLS	3
Cacna1i	UNC25973007	GNS;LEC;T CELLS	3
Lgals2	UNC25973007	GNS;LEC;T CELLS	3
Six3os1	UNC28568144	GNS;MATRIXFIB	2
Olfr554	JAX00647000	GNS;MATRIXFIB	2
Snph	UNC4188191	GNS;MATRIXFIB;NK	3
Gm11679	UNC20473322	LEC	1
Trim54	UNC050328653	LEC	1
Anks4b	UNC13663912	LEC	1
Slc35f2	JAX00171670	LEC	1
Pnliprp1	backupJAX00481224	LEC	1
Slc38a11	UNC3276311	LEC	1
Gm15550	UNC11018236	LEC	1
Gm11008	JAX00513288	LEC	1
Klrc3	UNC12031379	LEC	1
Gm10131	UNC14378234	LEC	1
C230062I16Rik	JAX00634115	LEC	1
Gm6541	JAX00379336	LEC;MATRIXFIB	2
Krt1	UNC26222650	LEC;MATRIXFIB;MPS;T CELLS	4
Dscaml1	UNC16294504	LEC;MATRIXFIB;NK;T CELLS	4
Scn4b	UNC16264077	LEC;MATRIXFIB;NK;T CELLS	4
Tceal3	backupUNC200692256	LEC;MATRIXFIB;T CELLS	3
Gm8093	UNC16668662	LEC;MATRIXFIB;T CELLS	3
Gm15477	UNC9355598	LEC;MPS	2
Gm7792	JAX00588731	LEC;MPS;T CELLS	3
Klra7	UNC12041209	LEC;NK	2
Gm11683	UNC20405755	LEC;NK;T CELLS	3
Gabrb1	backupUNC051053262	MATRIXFIB	1
Krt24	UNC20182609	MATRIXFIB	1
EU599041	JAX00150300	MATRIXFIB	1
Gm17227	JAX00470266	MATRIXFIB	1
Rpl7a	JAX00485026	MATRIXFIB	1
Insl3	JAX00671644	MATRIXFIB	1
Gm9796	JAX00319745	MATRIXFIB	1
C130046K22Rik	JAX00319724	MATRIXFIB	1
Kcnd3	UNC5892153	MATRIXFIB	1
Gm5483	UNC26680639	MATRIXFIB	1
Gal3st4	JAX00598764	MATRIXFIB	1
Gm17057	UNC26197693	MATRIXFIB;MPS	2
Fbxo15	UNC29761693	MATRIXFIB;NK	2
Naip3	JAX00048262	MATRIXFIB;NK;T CELLS	3
Gm10059	JAX00577482	MATRIXFIB;NK;T CELLS	3
Hsd3b3	JAX00530360	MPS	1
Cwc22	UNC3371968	MPS	1
Gm12295	JAX00028113	MPS	1
Chrna4	UNC4563798	MPS	1
Mir686	UNC23998790	MPS	1
Cbln3	UNC24047072	MPS	1
Zfp663	UNC4413860	MPS	1
Gm10638	UNC15177911	MPS	1
Mir1962	JAX00157039	MPS;NK	2
Npffr1	UNC18131977	MPS;NK	2
Gcgr	UNC20476679	NK	1
Sptlc3	UNC4035502	NK	1
Gstp2	backupUNC190140806	NK	1
Tigd3	JAX00086821	NK	1
Gm13680	JAX00096419	NK	1
Psma8	UNC28747070	NK	1
E130018O15Rik	JAX00579631	NK	1
Ifi27l2b	JAX00343087	NK;T CELLS	2
C920008G01Rik	UNC23998790	NK;T CELLS	2
Csl	UNC18500542	NK;T CELLS	2
Gm11516	UNC110136152	T CELLS	1
Gm14504	UNC30626502	T CELLS	1
Trpm1	UNC12883542	T CELLS	1
Gm10242	UNC060377743	T CELLS	1
Insl6	UNC30153772	T CELLS	1
Ddx43	UNC090153823	T CELLS	1
Gpr83	UNC15893968	T CELLS	1
E030030I06Rik	UNC17536677	T CELLS	1
Kcne1	UNC27394688	T CELLS	1
Hist2h4	UNC5790925	T CELLS	1
Ccdc148	UNC3197203	T CELLS	1
